# Supplementary material for: High-dose testosterone supplementation disturbs liver pro-oxidant/antioxidant balance and function in adolescent male Wistar rats undergoing moderate-intensity endurance training
Source: PeerJ. 2020 Nov 19;8:e10228. doi: 10.7717/peerj.10228 (PMC7680624; doi:10.7717/peerj.10228)
Supplement: Supplemental Information 3 [file peerj-08-10228-s003.xlsx]

## Sheet: Szczury-09-01-2018_FINAL
Rat group	Weekly TE dose [mg/kgBW]	AST [U/l]	ALP [U/l]	ALT [U/l]	GGT [U/l]
UTr	0	132.7	136	58.9	1.1
UTr	0	142	161	58.8	0.6
UTr	0	150.3	175	67.4	1.1
UTr	0	149.5	154	53
UTr	0	162.5	141	68	0.9
UTr	0	132.4	204	63.3	1.2
UTr	0	149.6	150	52.7	1
UTr	0	143.1	137	48.8	0.9
UTr	0	131.7	157	47.5	0.9
UTr	0	146.2	156	49.5	0.8
UTr	0	135	133	49.7	1.3		UTr - untrained rats
UTr+TE8	8	148.2	171	64.4			TE - testosterone enanthate
UTr+TE8	8	145	168	56.8	1.2
UTr+TE8	8	139.1	179	68.2	0.8
UTr+TE8	8	152	180	59.3	1.2
UTr+TE8	8	192	182	65.3	0.8
UTr+TE8	8	155	160	65.7	0.7
UTr+TE8	8	126.2	170	56.8	1.4
UTr+TE8	8	148.4	170	56.5	1.6
UTr+TE8	8	177.7	208	52.8	0.9
UTr+TE8	8	165.1	204	56.7	1.4
UTr+TE8	8	146.3	159	64.9	0.7
UTr+TE8	8	145.9	163	64.9	0.8
UTr+TE8	8	154.6	171	61.7	0.4
UTr+TE80	80	163.9	191	74.2	0.9
UTr+TE80	80	228.9	164	78.9	1
UTr+TE80	80	199.6	193	76	1.7
UTr+TE80	80	194.6	162	75.6	1
UTr+TE80	80	217.3	164	83.1	1.4
UTr+TE80	80	157.5	184	85.6	1.5
UTr+TE80	80	160.6	176	81.3	1.7
UTr+TE80	80	177.9	186	78.3
UTr+TE80	80	187.8	197	60.7	0.4
UTr+TE80	80	178.5	201	73.5	0.6
UTr+TE80	80	180.8	154	61.9	1.2
UTr+TE80	80	172.5	206	63.9	0.8
UTr+TE80	80	175.2	160	72.5	0.6
Correlated variables					Spearman's rank correlation
					N	Rs	t(N-2)	p
Weekly TE dose [mg/kgBW] & serum AST activity [U/l]					37	0.744098	6.58934	1.30297e-07
Weekly TE dose [mg/kgBW] & serum ALP activity [U/l]					37	0.501696	3.43112	0.00155877
Weekly TE dose [mg/kgBW] & serum ALT activity [U/l]					37	0.702912	5.84651	1.23006e-06
Weekly TE dose [mg/kgBW] & serum GGT activity [U/l]					34	0.0637396	0.3613	0.720249
						*

## Sheet: Arkusz3
	Para zmiennych	Korelacja porządku rang Spearmana (Szczury-09-01-2018_FINAL.sta) BD usuwane parami Oznaczone wsp. korelacji są istotne z p <.05000 Warunek uwzględniania: v1=2
		N	R	t(N-2)	p
	TE dawka & AST	31	0.204682	1.12609	0.269361
	TE dawka & ALP	31	0.612855	4.17659	0.000247191
	TE dawka & ALT	31	0.360641	2.08224	0.0462513
	TE dawka & GGT	31	0.687753	5.10185	1.91117e-05
	Para zmiennych	Korelacja porządku rang Spearmana (Szczury-09-01-2018_FINAL.sta) BD usuwane parami Oznaczone wsp. korelacji są istotne z p <.05000 Warunek uwzględniania: v1=1
		N	R	t(N-2)	p
	TE dawka & AST	37	0.744098	6.58934	1.30297e-07
	TE dawka & ALP	37	0.501696	3.43112	0.00155877
	TE dawka & ALT	37	0.702912	5.84651	1.23006e-06
	TE dawka & GGT	37	0.0473596	0.280498	0.780747
